# Supplementary material
Source: PubMed Central journal article supplement (PMC6547120)

## Supplementary Online Content

Yu J, Huang C-M, Su Y, et al. Effect of laparoscopic vs open distal gastrectomy on 3-year disease-free survival in patients with locally advanced gastric cancer: the CLASS-01 randomized clinical trial Yu J, Huang C-M, Sun Y, et al. *JAMA*. doi:10.1001/jama.2019.5359

**eTable 1.** Eligibility Criteria for the Enrollment of the Patients

**eTable 2.** Univariate and Multivariable Mixed Effects Cox Regression Analyses of Risk Factors for Survival

**eFigure 1.** Cumulative Incidence of Any Recurrence for Laparoscopic Distal Gastrectomy vs Open Distal Gastrectomy within 3 Years after Surgery

**eFigure 2.** Kaplan-Meier Curves of Cumulative Probability of Recurrence or Death for Laparoscopic Distal Gastrectomy vs Open Distal Gastrectomy within 3 Years after Surgery by Lymph Node Status of Pathologic T4a Stage

**eFigure 3.** Kaplan-Meier Curves of Cumulative Probability of Death for Laparoscopic Distal Gastrectomy vs Open Distal Gastrectomy within 3 Years after Surgery, Overall and by Pathologic Stage (I, II, III)

**eFigure 4.** Kaplan-Meier Curves of Cumulative Probability of Death for Laparoscopic Distal Gastrectomy vs Open Distal Gastrectomy within 3 Years after Surgery by Lymph Node Status of Pathologic T4a Stage

This supplementary material has been provided by the authors to give readers additional information about their work.

**eTable 1. Eligibility Criteria for the Enrollment of the Patients**

| <b>Inclusion</b>                                                                                        |
|---------------------------------------------------------------------------------------------------------|
| 18 < age < 75 years                                                                                     |
| Primary gastric adenocarcinoma confirmed pathologically by endoscopic biopsy                            |
| cT2-4a, N0-3, M0 at preoperative evaluation according to the AJCC Cancer Staging 7th Edition            |
| Expected curative resection via distal subtotal gastrectomy with D2 lymphadenectomy                     |
| Performance status of 0 or 1 on the ECOG (Eastern Cooperative Oncology Group) scale                     |
| ASA (American Society of Anesthesiology) score class I, II, or III                                      |
| Written informed consent                                                                                |
| <b>Exclusion</b>                                                                                        |
| Pregnant or breast-feeding women                                                                        |
| Severe mental disorder                                                                                  |
| Previous upper abdominal surgery (except laparoscopic cholecystectomy)                                  |
| Previous gastrectomy, endoscopic mucosal resection or endoscopic submucosal dissection                  |
| Enlarged or bulky regional lymph node diameter larger than 3 cm based on preoperative imaging           |
| Other malignant disease within the past five years                                                      |
| Previous neoadjuvant chemotherapy or radiotherapy                                                       |
| Unstable angina, myocardial infarction, or cerebrovascular accident within the past six months          |
| Continuous systematic administration of corticosteroids within one month prior to the study             |
| Requirement of simultaneous surgery for other diseases                                                  |
| Emergency surgery due to a complication (bleeding, obstruction or perforation) caused by gastric cancer |
| FEV1 (Forced expiratory volume in 1 second) <50% of predicted values                                    |

**eTable 2. Univariate and Multivariable Mixed Effects Cox Regression Analyses of Risk Factors for Survival**

| Variables                                                    | Disease-free survival                      |                |                      |                | Overall survival        |                |                       |                |
|--------------------------------------------------------------|--------------------------------------------|----------------|----------------------|----------------|-------------------------|----------------|-----------------------|----------------|
|                                                              | Univariate                                 |                | Multivariable        |                | Univariate              |                | Multivariable         |                |
|                                                              | HR <sup>a</sup> (95% CI) <sup>b</sup>      | P Value        | HR (95% CI)          | P Value        | HR (95% CI)             | P Value        | HR (95% CI)           | P Value        |
| Procedure (laparoscopic vs open)                             | 1.07 (0.83 to 1.39)                        | .59            | 1.10 (0.84 to 1.43)  | .49            | 1.17 (0.86 to 1.59)     | .33            | 1.19 (0.87 to 1.64)   | .28            |
| Age (≥60 vs <60 years )                                      | 1.58 (1.22 to 2.05)                        | <.001          | 1.52 (1.16 to 1.99)  | .002           | 1.59 (1.16 to 2.17)     | .004           | 1.53 (1.11 to 2.10)   | .009           |
| Sex (Male vs Female)                                         | 0.93 (0.71 to 1.22)                        | .58            |                      |                | 0.91 (0.65 to 1.27)     | .59            |                       |                |
| Body-mass index (≥25 vs <25 kg/m <sup>2</sup> ) <sup>c</sup> | 0.77 (0.55 to 1.08)                        | .13            |                      |                | 0.78 (0.52 to 1.17)     | .22            |                       |                |
| ECOG score (1 vs 0)                                          | 1.01 (0.73 to 1.38)                        | .97            |                      |                | 1.18 (0.81 to 1.72)     | .40            |                       |                |
| Comorbidity (Yes vs No)                                      | 1.00 (0.75 to 1.34)                        | .99            |                      |                | 0.95 (0.67 to 1.36)     | .78            |                       |                |
| Tumor size (≥4.0 vs <4.0 cm)                                 | 2.40 (1.78 to 3.24)                        | <.001          | 1.18 (0.85 to 1.64)  | .31            | 2.67 (1.83 to 3.89)     | <.001          | 1.18 (0.74 to 1.76)   | .43            |
| Histology (signet-ring cell vs others)                       | 0.94 (0.67 to 1.34)                        | .75            |                      |                | 1.16 (0.77 to 1.73)     | .47            |                       |                |
| Pathological T stage <sup>d</sup>                            |                                            |                |                      |                |                         |                |                       |                |
| <T2                                                          | 1 [Reference]                              |                | 1 [Reference]        |                | 1 [Reference]           |                | 1 [Reference]         |                |
| T2-4a                                                        | 4.42 (2.69 to 7.25)                        | <.001          | 1.80 (1.04 to 3.12)  | .04            | 7.12 (3.33 to 15.22)    | <.001          | 2.84 (1.26 to 6.41)   | .01            |
| T4b                                                          | 22.29 (9.46 to 52.53)                      | <.001          | 7.39 (2.95 to 18.54) | <.001          | 54.62 (18.72 to 159.36) | <.001          | 17.16 (5.59 to 52.72) | <.001          |
| Pathological N stage <sup>d</sup>                            |                                            |                |                      |                |                         |                |                       |                |
| N0                                                           | 1 [Reference]                              |                | 1 [Reference]        |                | 1 [Reference]           |                | 1 [Reference]         |                |
| N1                                                           | 1.73 (1.03 to 2.88)                        | .04            | 1.27 (0.74 to 2.18)  | .39            | 1.60 (0.81 to 3.18)     | .18            | 1.18 (0.58 to 2.43)   | .65            |
| N2                                                           | 3.03 (1.96 to 4.68)                        | <.001          | 2.39 (1.50 to 3.81)  | <.001          | 3.37 (1.94 to 5.87)     | <.001          | 2.62 (1.46 to 4.70)   | .001           |
| N3                                                           | 7.61 (5.27 to 10.98)                       | <.001          | 5.24 (3.47 to 7.92)  | <.001          | 8.83 (5.54 to 14.07)    | <.001          | 5.74 (3.42 to 9.63)   | <.001          |
| <b>Variables</b>                                             | <b>Disease-free survival</b>               |                |                      |                | <b>Overall survival</b> |                |                       |                |
|                                                              | <b>Univariate</b>                          |                | <b>Multivariable</b> |                | <b>Univariate</b>       |                | <b>Multivariable</b>  |                |
|                                                              | <b>HR<sup>a</sup> (95% CI)<sup>b</sup></b> | <b>P Value</b> | <b>HR (95% CI)</b>   | <b>P Value</b> | <b>HR (95% CI)</b>      | <b>P Value</b> | <b>HR (95% CI)</b>    | <b>P Value</b> |
| Received adjuvant chemotherapy                               |                                            | <.001          |                      | .19            |                         | .23            |                       |                |
| No                                                           | 1 [Reference]                              |                | 1 [Reference]        |                | 1 [Reference]           |                |                       |                |
| Yes                                                          | 1.61 (1.23 to 2.09)                        |                | 1.21 (0.91 to 1.60)  |                | 1.22 (0.88 to 1.68)     |                |                       |                |

<sup>a</sup>HR denotes hazard ratio for recurrence or death.

<sup>b</sup>CI denotes confidence interval, estimated by mixed effects Cox proportional hazards model.

<sup>c</sup>The body-mass index is the body weight in kilograms divided by the square of the height in meters.

<sup>d</sup>Tumor stage according to American Joint Committee on Cancer 7th Edition.

**eFigure 1. Cumulative Incidence of Any Recurrence for Laparoscopic Distal Gastrectomy vs Open Distal Gastrectomy within 3 Years after Surgery.**

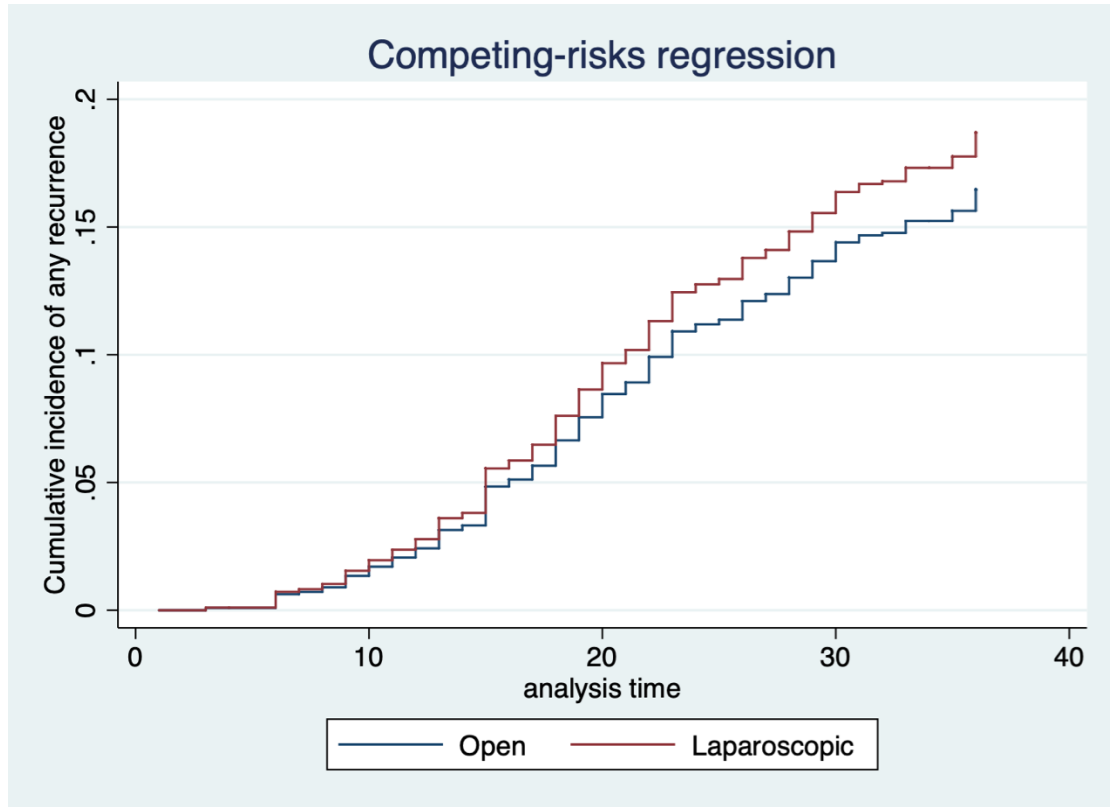

**eFigure 2. Kaplan-Meier Curves of Cumulative Probability of Recurrence or Death for Laparoscopic Distal Gastrectomy vs Open Distal Gastrectomy within 3 Years after Surgery by Lymph Node Status of Pathologic T4a Stage.**

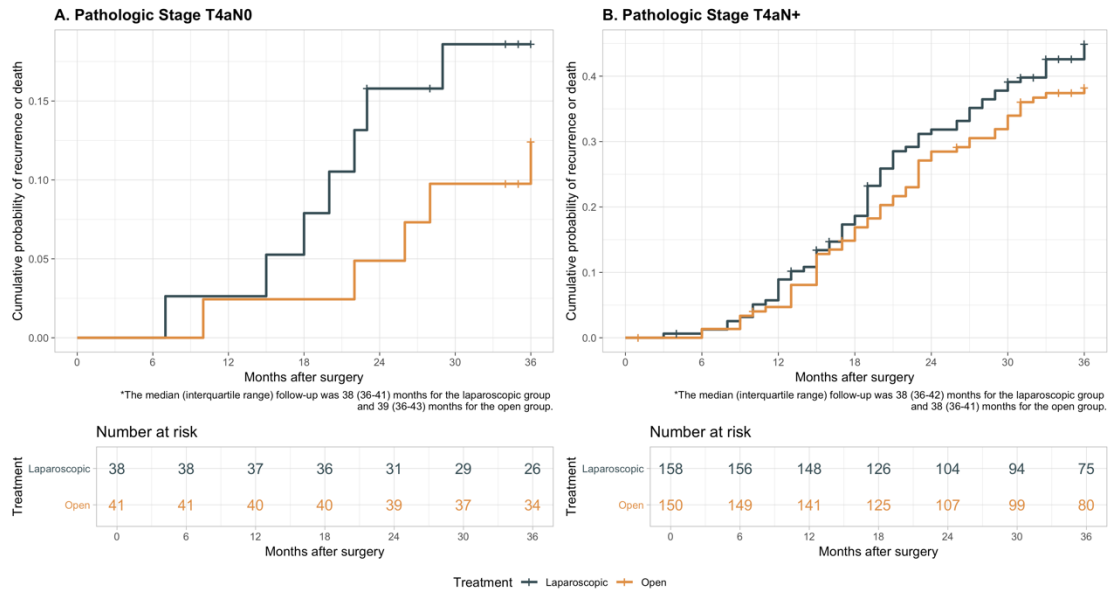

**eFigure 3. Kaplan-Meier Curves of Cumulative Probability of Death for Laparoscopic Distal Gastrectomy vs Open Distal Gastrectomy within 3 Years after Surgery, Overall and by Pathologic Stage (I, II, III).**

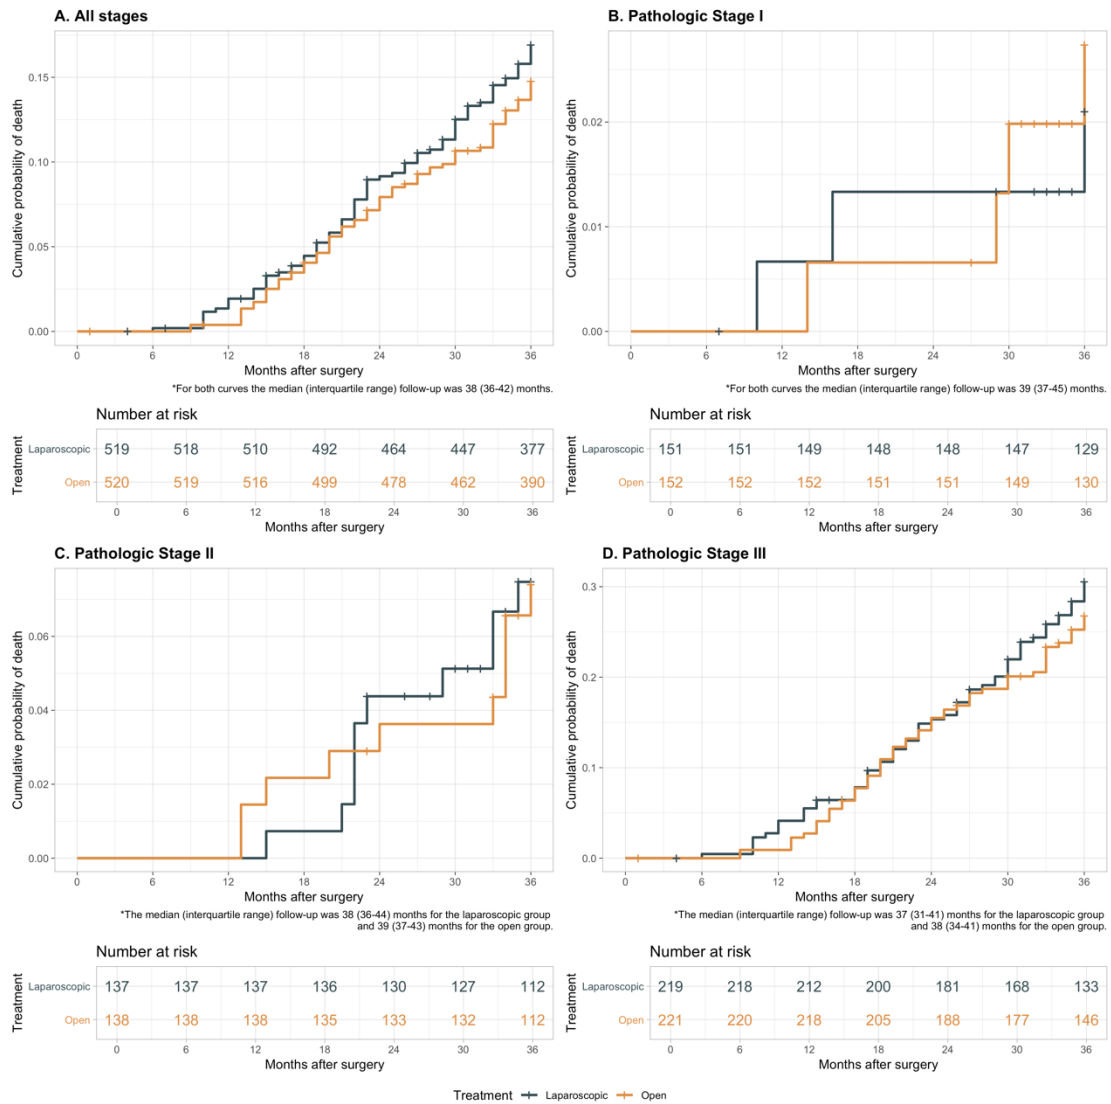

**eFigure 4. Kaplan-Meier Curves of Cumulative Probability of Death for Laparoscopic Distal Gastrectomy vs Open Distal Gastrectomy within 3 Years after Surgery by Lymph Node Status of Pathologic T4a Stage.**

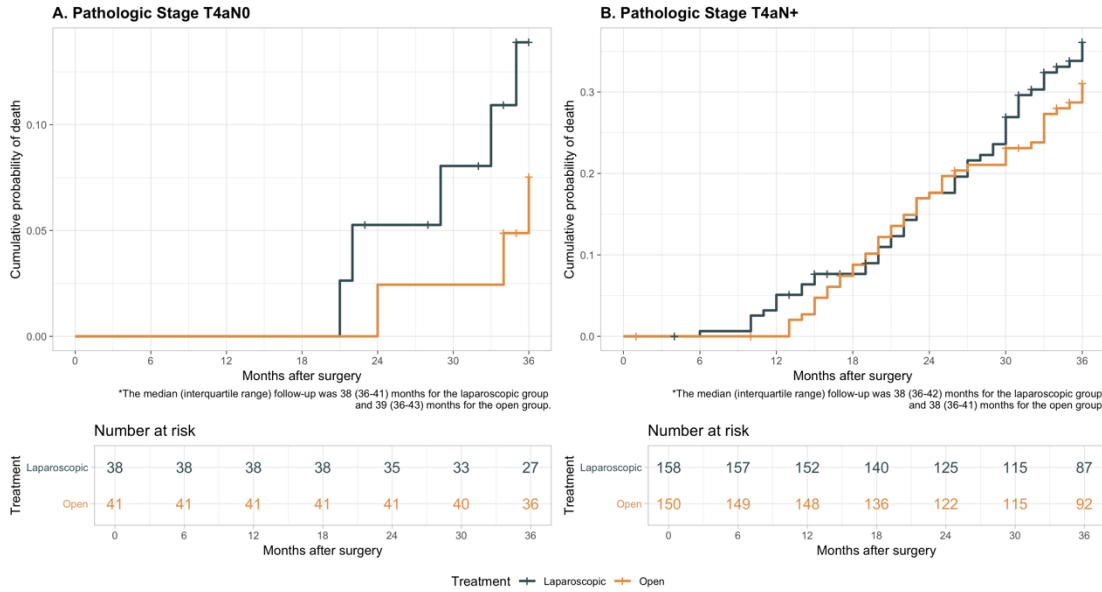

Supplement: jama-321-1983-s002.pdf [file jama-321-1983-s002.pdf]
