# Supplementary material
Source: PubMed Central journal article supplement (PMC6547120)
Supplement: jama-321-1983-s003.pdf [file jama-321-1983-s003.pdf]

## Data Sharing Statement

Yu. Effect of Laparoscopic vs Open Distal Gastrectomy on 3-Year Disease-Free Survival in Patients With Locally Advanced Gastric Cancer. *JAMA*. Published May 28, 2019. 10.1001/jama.2019.5359

### Data

**Data available:** No.

Data available: No

### Additional Information:

Explanation for why data not available: The data is not ready for data sharing with others now. We are planning to perform subanalysis.
